# Supplementary material for: Counterfeit formulations: analytical perspective on anorectics
Source: Springer Nature journal article supplement (doi:10.1007/s11419-020-00564-5), 2021-01-01
Supplement: MOESM1 [file 18717458]

**Supplementary material**

**Counterfeit formulations: analytical perspective on anorectics**

Dan Osei Mensah Bonsu1, 2, 3, 4 Constance Afoakwah1, Maria de la Paz Aguilar-Caballos4

1Department of Forensic Sciences, University of Cape Coast, PMB UCC, Cape Coast, Central Region, Ghana

2Australian Centre for Ancient DNA (ACAD), School of Biological Sciences, The University of Adelaide, SA 5000, North Terrace, Adelaide, Australia

3School of Chemistry, University of Lincoln, Brayford Pool, Lincoln LN6 7TS, Lincolnshire, United Kingdom

4Departamento de Química Analítica, Instituto Universitario de Química Fina y Nanoquímica (IUNAN), Facultad de Ciencias, Campus Universitario de Rabanales, Universidad de Córdoba, 14014-Córdoba, España

**Corresponding author**

Correspondence to Dan O. M Bonsu ([danoseimensah.bonsu@adelaide.edu.au](mailto:danoseimensah.bonsu@adelaide.edu.au))

**Table S1** Trade names, dosage forms and undeclared active ingredients of counterfeit slimming products (chronologically and alphabetically arranged) reported in the US from April 2009 to December 2019

| **Year** | **Trade Name** | **Dosage form** | **Undeclared ingredients** |
| --- | --- | --- | --- |
| 2009 | Venom Hyperdrive 3.0 | Capsules | Sibutramine |
| 2010 | Alli (counterfeited version of orlisat) | Capsules | Sibutramine |
| Fruta Planta | Capsules | Sibutramine |
| Que She | Capsules | Sibutramine, fenfluramine, propranolol, ephedrine |
| Reduce Weight Fruta Planta | Capsules | Sibutramine |
| Slimming Beauty Bitter Orange Slimming | Capsules | Sibutramine |
| Superslim, 2 Day Diet, and Meitzitang | Capsules | Sibutramine |
| 2011 | A-Slim | Capsules | Sibutramine |
| Advanced Slim 5 | Caplets | Sibutramine |
| Celerite Slimming Capsules | Capsules | Sibutramine |
| Slender Slim 11 | Capsules | Sibutramine |
| Slim Xtreme Diamond, Slim Xtreme Platinum | Capsules | Sibutramine |
| 2012 | Beautiful Slim Body | Capsules | Sibutramine |
| Best Share Green Coffee | Powder | Sibutramine |
| Japan Hokkaido Slimming Weight Loss Pills | Capsules | Sibutramine |
| Japan Rapid Weight Loss Diet Pills Green | Capsules | Phenolphthalein |
| Japan Rapid Weight Loss Diet Pills Yellow | Capsules | Sibutramine, phenolphthalein |
| Zi Xiu Tang Bee Pollen Capsules | Capsules | Sibutramine |
| 2013 | Asset Extreme | Capsules | Sibutramine |
| Asset Extreme Plus | Capsules | Sibutramine |
| Bella Vi Amp’d Up | Capsules | Sibutramine, phenolphthalein |
| Bella Vi Insane Amp’d | Capsules | Sibutramine, phenolphthalein |
| Bethel 30 | Capsules | Sibutramine |
| Body Beauty 5 Days Slimming Coffee | Powder | Sibutramine |
| Burn 7 | Capsules | Sibutramine |
| 1 Day Diet | Capsules | *N*-desmethylsibutramine, sibutramine |
| 7 Days Herbal Slim | Capsules | Sibutramine |
| Diet Master | Capsules | Sibutramine, phenolphthalein |
| Dr. Mao Slimming Capsules | Capsules | Sibutramine |
| Dr. Ming’s Chinese Capsule | Capsules | Sibutramine, phenolphthalein |
| Fat Zero | Capsules | Sibutramine |
| Instant Slim (aka hou Fu Ti Tun Guo Xiang Xing Jian Fei Jiao Nang) | Capsules | Sibutramine, phenolphthalein |
| Jimpness Beauty Fat Loss Capsules | Capsules | Sibutramine, phenolphthalein, and sildenafil |
| MAXILOSS Weight Advanced | Capsules | Sibutramine |
| MAXILOSS Weight Advanced Blue | Capsules | Sibutramine |
| Meizi Evolution | Capsules | Sibutramine |
| Meizitang Citrus | Capsules | Sibutramine |
| Perfect Body Solutions | Capsules | Sibutramine |
| Slim Max | Capsules | Sibutramine, phenolphthalein |
| SlimEasy Herbs Capsule | Capsules | Sibutramine |
| SlimExtra Herbal Capsules | Capsules | Sibutramine |
| Sliming (sic) Diet Berry Plus | Powder | Sibutramine |
| Strawberry Balance | Tea | Sibutramine, phenolphthalein |
| Super Slim | Capsules | Sibutramine, phenolphthalein |
| 2014 | Asset Bee Pollen | Capsules | Sibutramine |
| Asset Bold | Capsules | Sibutramine |
| B-Perfect | Capsules | Sibutramine, phenolphthalein |
| Citrus Fit Gold | Capsules | Sibutramine |
| Dream Body Slimming Capsule | Capsules | Sibutramine |
| Infinity | Capsules | Sibutramine |
| Japan Hokkaido Slimming Weight Loss Pills | Capsules | Sibutramine, benzocaine, phenolphthalein and diclofenac |
| 24 Ince | Tea | Sibutramine |
| La Jiao Shou Shen | Capsules | Sibutramine, phenolphthalein |
| Lingzhi Cleansed Slim Tea | Tea | Sibutramine |
| Lipo 8 Burn Slim Capsules | Capsules | Sibutramine |
| Lite Fit USA | Capsules | Sibutramine |
| Mix Fruit Slimming | Capsules | sibutramine, phenolphthalein |
| Natural Body Solution | Capsules | Sibutramine |
| New You Contains | Tea | Sibutramine, phenolphthalein |
| Slim Trim U | Capsules | Sibutramine |
| Slim-K | Capsules | Sibutramine, an analog of sibutramine, and phenolphthalein |
| Slim-Vie | Capsules | Sibutramine |
| Sliming (sic) Diet by Pretty White | Capsules | Sibutramine |
| Sliming Diet | Capsules | Sibutramine |
| Sport Burner | Capsules | Fluoxetine |
| Super Extreme Accelerator | Capsules | Sibutramine |
| Thinogenics | Capsules | Sibutramine |
| Tonic Life BP | Capsules | Phenolphthalein |
| Toxin Discharged Tea | Tea | Fluoxetine |
| Trim-Fast Slimming Softgel | Capsules | Sibutramine |
| Vitaccino Coffee | Powder | Sibutramine |
| 2015 | Achieving Zero | Capsules | Sibutramine |
| Akttive Capsules | Capsules | Sibutramine, desmethylsibutramine, and phenolphthalein |
| Basha Nut 100% Fruit Soft Gel | Capsules | Sibutramine |
| Black Mamba Hyperrush | Capsules | Sibutramine |
| Botanical Slimming (Red) | Capsules | Fluoxetine |
| Diablos Eca Fire Caps | Capsules | Sildenafil, phenolphthalein, sibutramine, deisobutylbenzylsibutramine |
| Elimulating Weight & Toxin Keeping Beauty | Capsules | Sibutramine |
| Evolve Bee Pollen | Capsules | Sibutramine, phenolphthalein |
| Fatloss Slimming Beauty | Capsules | Sildenafil |
| Green Algae Combination by Crane Beauty | Capsules | Lorcaserin |
| Jenesis | Capsules | Sibutramine, phenolphthalein |
| L-Carnitine Sob Strengthening Version Slimming Miracle | Capsules | Sibutramine |
| La’Trim Plus | Capsules | Sibutramine, phenolphthalein |
| Lean Body Extreme | Capsules | Sibutramine, desmethylsibutramine, phenolphthalein, and sildenafil |
| Li Da Dai Dai Hua Slimming Capsule | Capsules | Sibutramine |
| Lipo Escultura Contains | Capsules | Sibutramine, diclofenac |
| Lishou Slimming Coffee | Powder | Sibutramine |
| Meizi Super Power Fruits Herbal Slimming Formula | Capsules | Sibutramine |
| Natural Max Slimming | Capsules | Sildenafil, fluoxetine and sibutramine |
| NATUREAL | Capsules | Sibutramine |
| Nine Slim | Capsules | Phenolphthalein |
| Oasis Bee Pollen | Capsules | Sibutramine |
| Oxy ELITE Pro Super Thermogenic | Capsules | Fluoxetine |
| Perfect Slim Fast Track Slim | Capsules | Fluoxetine |
| Prime Bee Pollen | Capsules | Sibutramine |
| Seven Slim | Capsules | Phenolphthalein |
| Slim Forte Slimming Capsule | Capsules | Sibutramine |
| Slyn Both | Capsules | Fluoxetine |
| SPCARET Princess Diet | Capsules | Sibutramine |
| Super Herbs | Capsules | Sibutramine |
| Superior | Capsules | Sibutramine |
| Thirty Plus | Capsules | Sibutramine |
| Tip-Top Shape | Capsules | Sibutramine |
| Ultimate Boost | Capsules | Phenolphthalein |
| Ultimate Herbal Slimcap | Capsules | Sibutramine |
| Xcel | Capsules | Fluoxetine |
| Xcel Advanced | Capsules | Phenolphthalein |
| Xtreme Fat Burner Capsules | Capsules | Phenolphthalein |
| Yanhee Slim | Capsules | Lorcaserin |
| Zero Fat | Capsules | Sibutramine |
| Zero Xtreme Capsules | Capsules | Sibutramine and desmethylsibutramine |
| 2016 | ABX Weight Loss | Capsules | Sibutramine |
| Accelerator Boost | Capsules | Phenolphthalein |
| Adelganzantes R-II | Capsules | Sibutramine |
| Black Gold X Advanced | Capsules | Sibutramine |
| Black Label X | Capsules | Sildenafil |
| Citrus’ Fit | Capsules | Sibutramine, desmethylsibutramine |
| Dream Body Advanced + Acai Weight Loss & Cleanse | Capsules | Sibutramine, fluoxetine, sildenafil |
| 3rd Degree | Capsules | Sibutramine |
| Dream Body Extreme Gold | Capsules | Sibutramine, fluoxetine, sildenafil |
| Dream Body Original Formula | Capsules | Sibutramine |
| Dynamizm Capsules | Capsules | Sibutramine |
| ENVY BP | Capsules | Sibutramine |
| Eradicate Capsules | Capsules | Sibutramine, desmethylsibutramine |
| Exhilarate | Capsules | Sibutramine, desmethylsibutramine, phenolphthalein |
| Extra Slim Plus Acai Berry Weight Loss Formula | Capsules | Sibutramine |
| Mang Luk Power Slim | Capsules | Sibutramine |
| Mang Luk Power Slim Detox | Capsules | sibutramine, desmethylsibutramine |
| Maxx Easy | Powder | Sibutramine, lorcaserin, orlisat |
| Natural Eruption | Capsules | Sibutramine |
| Propell Platinum | Capsules | Sibutramine, phenolphthalein |
| Queen Slimming Soft Gel | Capsules | Sibutramine, fluoxetine |
| Results | Capsules | Sibutramine, phenolphthalein |
| SBF Bee Pollen | Capsules | Sibutramine |
| Skinny Bee Diet | Capsules | Sibutramine, desmethylsibutramine, phenolphthalein |
| Slim Fit X | Capsules | Sibutramine, desmethylsibutramine |
| Step 2 | Capsules | Sibutramine |
| Supreme Slim 5.7 | Capsules | Sildenafil, phenolphthalein |
| Ultimate Body Tox | Capsules | Sibutramine |
| Ultimate Lean | Capsules | Sibutramine, desmethylsibutramine |
| Xcelerated Weight Loss Charged Up | Capsules | Sibutramine |
| Xcelerated Weight Loss Turbo Charge | Capsules | Sibutramine |
| Xcelerated Weight Loss Ultra Max | Capsules | Phenolphthalein, sildenafil |
| Xerophagy Capsules | Capsules | Sibutramine |
| Zi Su Body Fat Health II | Capsules | Sibutramine, phenolphthalein |
| Zi Xiu Tang Beauty Face and Figure Capsule | Capsules | Fluoxetine, phenolphthalein |
| ZlimXter Capsules | Capsules | Sildenafil |
| 2017 | A1 Slim | Capsules | Sibutramine, phenolphthalein |
| Adipessum Miracle Slimming Capsules | Capsules | Fluoxetine |
| Asia Slim Capsules | Capsules | Sibutramine, diazepam, and bisacodyl. |
| Fruta Planta Life (Garcinia Cambogia Premium) | Capsules | Sibutramine |
| Lean Extreme Max | Capsules | Sibutramine |
| Physic Candy – Curve | Capsules | Sibutramine, phenolphthalein |
| Physic Candy – Define | Capsules | Sibutramine |
| Platinum Max Strength Blue Pill Version | Capsules | Sibutramine, phenolphthalein |
| Platinum Weight Loss Solution – Fat Loss Metabolizer | Capsules | Sibutramine, phenolphthalein |
| Slimming Plus Advanced | Capsules | Sibutramine, phenolphthalein |
| X-treme Beauty Slim | Capsules | Sibutramine |
| 2018 | AB Slim | Capsules | sibutramine, phenolphthalein, sildenafil |
| Adipotrim XT | Capsules | Phenolphthalein |
| Adriana Balance S | Capsules | Sibutramine |
| Asunsa | Powder | sibutramine, *N*-desmethylsibutramine, benzylsibutramine, phenolphthalein and diclofenac |
| Baschi Quick Slimming Capsule | Capsules | Sibutramine, *N*-desmethylsibutramine |
| Body Shape Weight Loss System | Capsules | Phenolphthalein |
| BodySlim Herbal | Capsules | Sibutramine |
| Easy 2 Slim | Capsules | Sibutramine |
| Green Lean Body Capsule | Capsules | Sibutramine, *N*-desmethylsibutramine |
| In Shape | Capsules | Sibutramine |
| Like Slim Coffee | Powder | Sibutramine |
| Lyn DTOX FS3 | Capsules | Sibutramine, *N*-desmethylsibutramine |
| Nuvitra | Capsules | Sibutramine, fluoxetine |
| PAYA Dietary Supplement Product | Capsules | Sibutramine |
| Pink Granada | Capsules | Sibutramine |
| Row of Antibody Pil | Capsules | Sibutramine, phenolphthalein |
| Shengan Natural Model | Capsules | Sibutramine |
| Slimming Capsule | Capsules | Sibutramine, phenolphthalein |
| 2019 | Absolute Nine Slim | Capsules | Sibutramine, *N*-desmethylsibutramine |
| Adelgasin Plus | Capsules | Sibutramine, *N*-desmethylsibutramine |
| CholesLo | Capsules | Lovastatin |
| Detox Plus | Capsules | Tadalafil, paynantheine, mitragynine. |
| Detoxi Slim | Capsules | Sibutramine |
| GoLean Detox | Capsules | Sibutramine, phenolphthalein |
| JaDera PLUS | Capsules | Sibutramine, *N*-desmethylsibutramine, benproperine |
| Lanugar | Capsules | Sibutramine, *N*-desmethylsibutramine |
| Lipro Dietary Capsule | Capsules | Tadalafil |
| Lishou Fuling Jiaonang | Capsules | Sibutramine, *N*-desmethylsibutramine |
| Love in S | Capsules | Sibutramine, *N*-desmethylsibutramine |
| Reduktis Max | Capsules | Sibutramine |
| Sheaya Lender | Capsules | Sibutramine, fluoxetine |
| Skinny Pill | Capsules | 1,3-dimethylamylamine (DMAA) |
| Slim Bio Capsules | Capsules | Sibutramine, *N*-desmethylsibutramine, sildenafil, tadalafil, benproperine and diphenhydramine. |
| Slimina | Capsules | Sibutramine |
| Slimmer Extreme Thermogenic Formula | Capsules | Sibutramine, phenolphthalein |
| Super Slimming Herb | Capsules | Sibutramine |
| Ultra Fit | Capsules | Sibutramine, *N*-desmethylsibutramine |
